# Supplementary material for: BVES is a novel interactor of ANO5 and regulates myoblast differentiation
Source: PubMed Central journal article supplement (PMC8715634; doi:10.1186/s13578-021-00735-w), 2021-12-28
Supplement: 13578_2021_735_MOESM1_ESM.pdf [file 13578_2021_735_MOESM1_ESM.pdf]

**Supplementary Table S1.** List of unique proteins identified by hANO5-BioID2.

| Accession          | Protein Name                                                                                                                                       |
|--------------------|----------------------------------------------------------------------------------------------------------------------------------------------------|
| Q9QZD9 EIF3I_MOUSE | Eukaryotic translation initiation factor 3 subunit I OS=Mus musculus GN=Eif3i PE=1 SV=1                                                            |
| Q9ES83 POPD1_MOUSE | Blood vessel epicardial substance OS=Mus musculus GN=Bves PE=1 SV=1                                                                                |
| Q9ES81 POPD3_MOUSE | Popeye domain-containing protein 3 OS=Mus musculus GN=Popdc3 PE=1 SV=1                                                                             |
| Q9EQK5 MVP_MOUSE   | Major vault protein OS=Mus musculus GN=Mvp PE=1 SV=4                                                                                               |
| Q9DC70 NDUS7_MOUSE | NADH dehydrogenase [ubiquinone] iron-sulfur protein 7, mitochondrial OS=Mus musculus GN=Ndufs7 PE=1 SV=1                                           |
| Q9DBG6 RPN2_MOUSE  | Dolichyl-diphosphooligosaccharide--protein glycosyltransferase subunit 2 OS=Mus musculus GN=Rpn2 PE=1 SV=1                                         |
| Q9D7G0 PRPS1_MOUSE | Ribose-phosphate pyrophosphokinase 1 OS=Mus musculus GN=Prps1 PE=1 SV=4                                                                            |
| Q9D773 RM02_MOUSE  | 39S ribosomal protein L2, mitochondrial OS=Mus musculus GN=Mrpl2 PE=1 SV=1                                                                         |
| Q9D2G2 ODO2_MOUSE  | Dihydrolipoyllysine-residue succinyltransferase component of 2-oxoglutarate dehydrogenase complex, mitochondrial OS=Mus musculus GN=Dlst PE=1 SV=1 |
| Q9CZW4 ACSL3_MOUSE | Long-chain-fatty-acid--CoA ligase 3 OS=Mus musculus GN=Acsl3 PE=1 SV=2                                                                             |
| Q9CPR5 RM15_MOUSE  | 39S ribosomal protein L15, mitochondrial OS=Mus musculus GN=Mrpl15 PE=1 SV=1                                                                       |
| Q99LX5 MMTA2_MOUSE | Multiple myeloma tumor-associated protein 2 homolog OS=Mus musculus GN=Mmtag2 PE=2 SV=1                                                            |
| Q99L43 CDS2_MOUSE  | Phosphatidate cytidyltransferase 2 OS=Mus musculus GN=Cds2 PE=1 SV=1                                                                               |
| Q91VH6 MEMO1_MOUSE | Protein MEMO1 OS=Mus musculus GN=Memo1 PE=1 SV=1                                                                                                   |
| Q8VCM8 NCLN_MOUSE  | Nicalin OS=Mus musculus GN=Ncln PE=1 SV=2                                                                                                          |
| Q8VBW5-2 BBX_MOUSE | Isoform 2 of HMG box transcription factor BBX OS=Mus musculus GN=Bbx                                                                               |
| Q8R010 AIMP2_MOUSE | Aminoacyl tRNA synthase complex-interacting multifunctional protein 2 OS=Mus musculus GN=Aimp2 PE=1 SV=2                                           |
| Q8K224 NAT10_MOUSE | RNA cytidine acetyltransferase OS=Mus musculus GN=Nat10 PE=1 SV=1                                                                                  |
| Q8BU33 ILVBL_MOUSE | Acetolactate synthase-like protein OS=Mus musculus GN=Ilvbl PE=1 SV=1                                                                              |
| Q8BJW6 EIF2A_MOUSE | Eukaryotic translation initiation factor 2A OS=Mus musculus GN=Eif2a PE=1 SV=2                                                                     |

|                      |                                                                                     |
|----------------------|-------------------------------------------------------------------------------------|
| Q8BHC4 DCAKD_MOUSE   | Dephospho-CoA kinase domain-containing protein OS=Mus musculus GN=Dcakd PE=1 SV=1   |
| Q7TMK9 HNRPQ_MOUSE   | Heterogeneous nuclear ribonucleoprotein Q OS=Mus musculus GN=Syncrip PE=1 SV=2      |
| Q75UR0 ANO5_MOUSE    | Anoctamin-5 OS=Mus musculus GN=Ano5 PE=2 SV=1                                       |
| Q6ZPE2 MTMR5_MOUSE   | Myotubularin-related protein 5 OS=Mus musculus GN=Sbf1 PE=1 SV=2                    |
| Q569Z5 DDX46_MOUSE   | Probable ATP-dependent RNA helicase DDX46 OS=Mus musculus GN=Ddx46 PE=1 SV=2        |
| Q3UL36 ARGL1_MOUSE   | Arginine and glutamate-rich protein 1 OS=Mus musculus GN=Arglu1 PE=1 SV=2           |
| Q3UJD6-2 UBP19_MOUSE | Isoform 2 of Ubiquitin carboxyl-terminal hydrolase 19 OS=Mus musculus GN=Usp19      |
| Q3UDE2 TTL12_MOUSE   | Tubulin--tyrosine ligase-like protein 12 OS=Mus musculus GN=Ttl12 PE=1 SV=1         |
| Q3TKT4-2 SMCA4_MOUSE | Isoform 2 of Transcription activator BRG1 OS=Mus musculus GN=Smarca4                |
| P70402 MYBPH_MOUSE   | Myosin-binding protein H OS=Mus musculus GN=Mybph PE=2 SV=2                         |
| P62814 VATB2_MOUSE   | V-type proton ATPase subunit B, brain isoform OS=Mus musculus GN=Atp6v1b2 PE=1 SV=1 |
| P60335 PCBP1_MOUSE   | Poly(rC)-binding protein 1 OS=Mus musculus GN=Pcbp1 PE=1 SV=1                       |
| P54775 PRS6B_MOUSE   | 26S proteasome regulatory subunit 6B OS=Mus musculus GN=Psmc4 PE=1 SV=2             |
| P42932 TCPQ_MOUSE    | T-complex protein 1 subunit theta OS=Mus musculus GN=Cct8 PE=1 SV=3                 |
| P41105 RL28_MOUSE    | 60S ribosomal protein L28 OS=Mus musculus GN=Rpl28 PE=1 SV=2                        |
| P23249 MOV10_MOUSE   | Putative helicase MOV-10 OS=Mus musculus GN=Mov10 PE=1 SV=2                         |
| P17427 AP2A2_MOUSE   | AP-2 complex subunit alpha-2 OS=Mus musculus GN=Ap2a2 PE=1 SV=2                     |
| P14873 MAP1B_MOUSE   | Microtubule-associated protein 1B OS=Mus musculus GN=Map1b PE=1 SV=2                |
| O88455 DHCR7_MOUSE   | 7-dehydrocholesterol reductase OS=Mus musculus GN=Dhcr7 PE=1 SV=1                   |
| O70475 UGDH_MOUSE    | UDP-glucose 6-dehydrogenase OS=Mus musculus GN=Ugdh PE=1 SV=1                       |
| O08528 HXK2_MOUSE    | Hexokinase-2 OS=Mus musculus GN=Hk2 PE=1 SV=1                                       |

**Supplementary Table S2.** List of plasmids used in this study.

| <b>Plasmid</b>  | <b>Name</b>                       | <b>Description</b>                                                                                                               |
|-----------------|-----------------------------------|----------------------------------------------------------------------------------------------------------------------------------|
| <b>pYG4010</b>  | plenti-hAno5 WT-BioID2            | Lentiviral vector expressing human ANO5 tagged with N-terminal 3xFLAG, C-terminal BioID2. Hygromycin selection                   |
| <b>pYG7012</b>  | pLVX-mAno6-BioID2                 | Lentiviral vector expressing mouse Ano6 tagged with C-terminal BioID2. Puromycin selection                                       |
| <b>pYG7032</b>  | pLVX-BioID2-mMG53                 | Lentiviral vector expressing mouse MG53 tagged with N-terminal myc and BioID2. Puromycin selection                               |
| <b>pHW_008</b>  | pCDNA3.1-hBVES-Myc                | Expression vector for human BVES with C-terminal myc tag                                                                         |
| <b>pHW_009</b>  | pCDNA3.1-hPOPDC2-Myc              | Expression vector for human POPDC2 with C-terminal myc tag                                                                       |
| <b>pHW_010</b>  | pCDNA3.1-hPOPDC3-Myc              | Expression vector for human POPDC3 with C-terminal myc tag                                                                       |
| <b>pXL-0311</b> | plenti-Flag-hAno5-WT-intron6-EGFP | Lentiviral vector expressing human ANO5 tagged with N-terminal 3xFLAG, C-terminal GFP. Hygromycin selection                      |
| <b>pXL_893</b>  | plenti-hAno5 1-433aa-EGFP         | Lentiviral vector expressing human ANO5 N-terminus 1-433 tagged with N-terminal 3xFLAG and C-terminal ECFP. Hygromycin selection |
| <b>pXL-0786</b> | Flag-hAno5 1-277 aa-EGFP          | Expression vector for human ANO5 N-terminus 1-277 tagged with N-terminal FLAG and C-terminal EGFP.                               |
| <b>pXL-0787</b> | Flag-hAno5 1-150 aa-EGFP          | Expression vector for human ANO5 N-terminus 1-150 tagged with N-terminal FLAG and C-terminal EGFP.                               |
| <b>pXL-0788</b> | Flag-hAno5 1-121 aa-EGFP          | Expression vector for human ANO5 N-terminus 1-121 tagged with N-terminal FLAG and C-terminal EGFP.                               |
| <b>pXL-0790</b> | Flag-hAno5 1-64 aa-EGFP           | Expression vector for human ANO5 N-terminus 1-64 tagged with N-terminal FLAG and C-terminal EGFP.                                |
| <b>pHW_019</b>  | pLVX-hBVES-3HA-puro-del 113-171   | Lentiviral vector expressing human BVES_del113-171 tagged with C-terminal 3xHA. Puromycin selection                              |
| <b>pYZ1085</b>  | pLVX-hBVES-3HA-puro-del 172-267   | Lentiviral vector expressing human BVES_del172-267 tagged with C-terminal 3xHA. Puromycin selection                              |

|                 |                                        |                                                                                                |
|-----------------|----------------------------------------|------------------------------------------------------------------------------------------------|
| <b>pHW_020</b>  | pLVX-hBVES-3HA-puro-truncates-1-267 aa | Lentiviral vector expressing human BVES_1-267 tagged with C-terminal 3xHA. Puromycin selection |
| <b>pXL-0057</b> | pLVX-mcherry-mAno5                     | Lentiviral vector expressing mouse Ano5 fused with mCherry. Puromycin selection                |
| <b>pXL-0111</b> | pEGFP-E2A-TAL6-mAno5-E5                | Expression vector for mouse Ano5 E5-TALEN pair                                                 |
| <b>pXL-0112</b> | pEGFP-E2A-TAL6-mAno5-E5A               | Expression vector for mouse Ano5 E5A-TALEN pair                                                |
| <b>pXL-0569</b> | pCMV_AncBE4max                         | Addgene #112094                                                                                |
| <b>pYZ1097</b>  | pCMV-AncBE4-GFP                        | Expression vector for AncBE4-2A-GFP fusion                                                     |
| <b>pYZ1083</b>  | pLenti-mBVES-gRNA                      | Lentiviral vector expressing mouse BVES targeting guide RNA. Zeocin selection                  |
| <b>pHW_004</b>  | pEGFP-C1-EEA1                          | Addgene #42307                                                                                 |
| <b>pHW_005</b>  | pEGFP-C1-Rab7                          | Addgene #12605                                                                                 |
| <b>pHW_006</b>  | pEGFP-C1-Rab11                         | Addgene #12674                                                                                 |
| <b>pHW_007</b>  | pEGFP-N1-LAMP1                         | Addgene #34831                                                                                 |

**Supplementary Figure S1.** Western blot analysis of exogenous expression of human BVES, POPDC2 and POPDC3 in COS-1 cells.

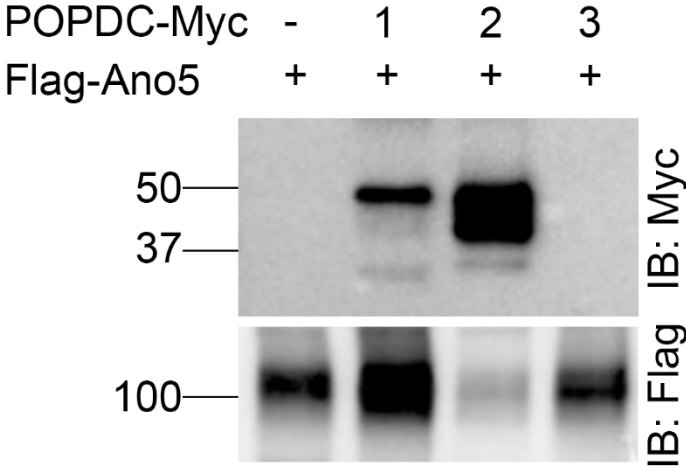

**Supplementary Figure S2.** Immunofluorescence staining images of COS-1 cells expressing BVES-myc and GFP markers for endosomes and lysosomes.

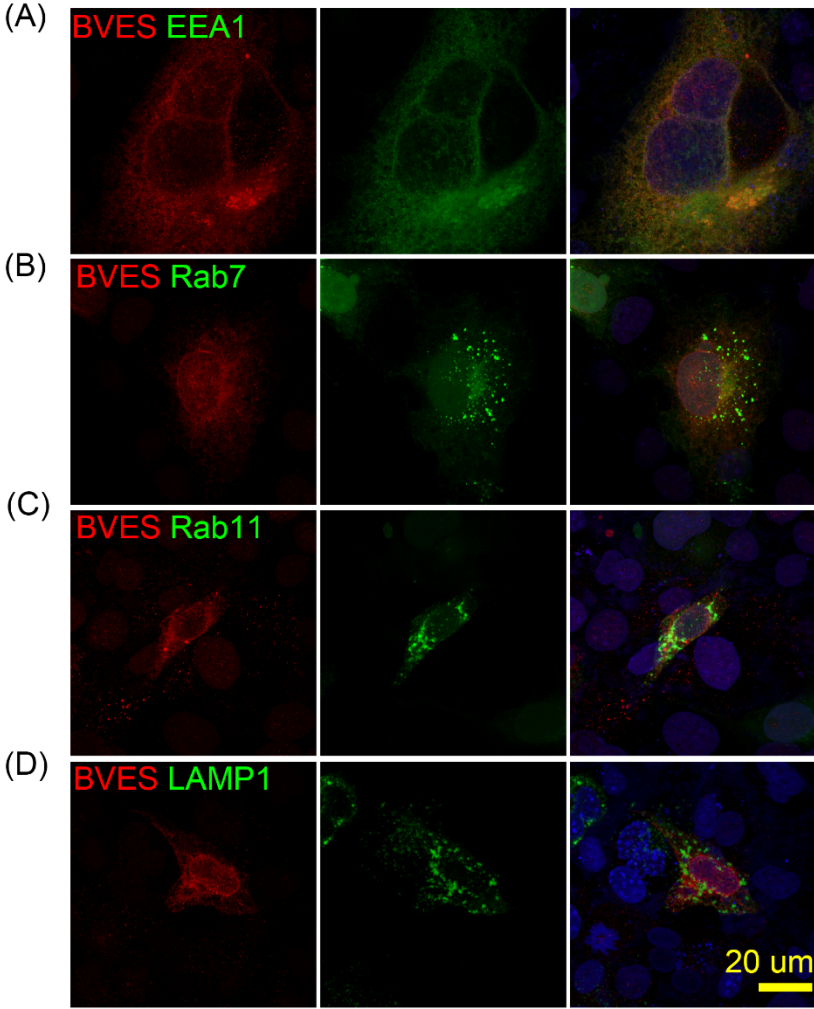

**Supplementary Figure S3.** Sequence alignment showing the 542bp deletion in the genomic DNA of the E5A8-12 Clone.

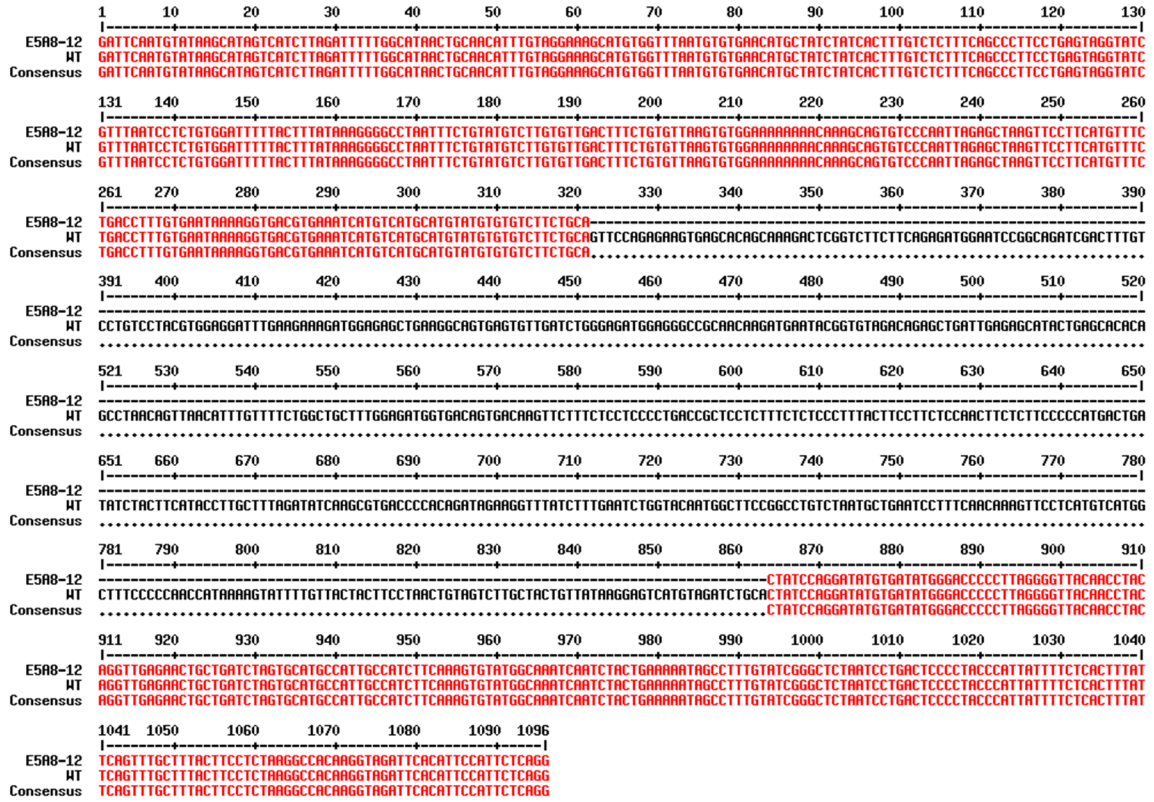

**Supplementary Figure S4.** Photographs of WT and *Ano5*-KO C2C12 cells differentiated for 5 days. Scale bar: 100  $\mu$ m.

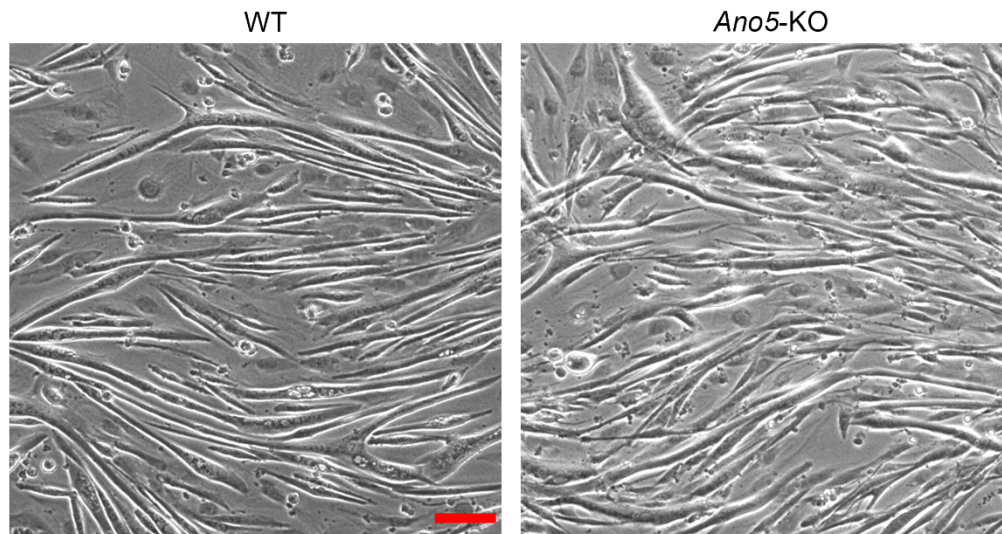

**Supplementary Figure S5.** Differentiation of WT and *Bves*-KO C2C12 cells differentiated for 5 days. Scale bar: 200  $\mu$ m.

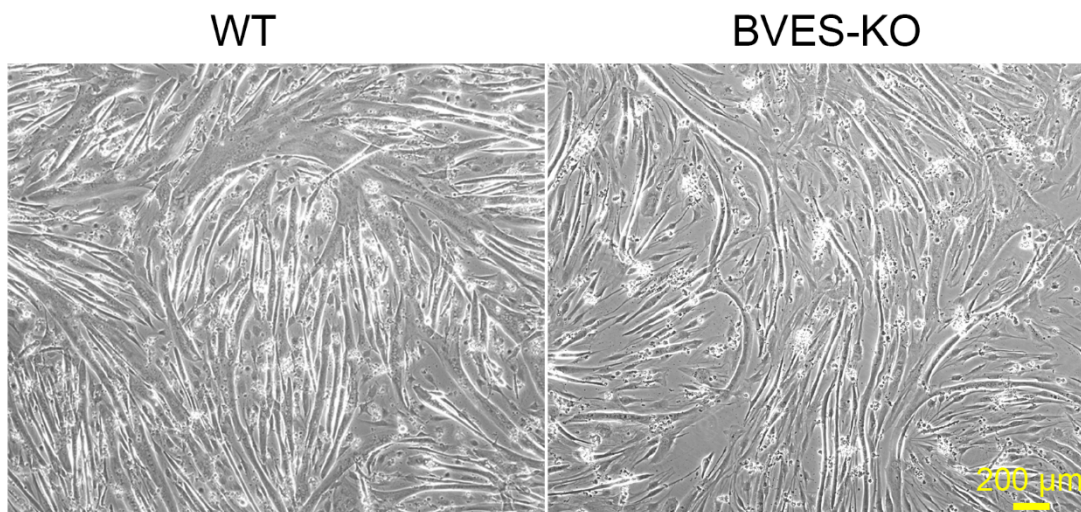

**Supplementary Figure S6.** Amino acid sequences of *Ano5*E5-TALEN and *Ano5*E5A-TALEN.

>*Ano5*E5-TALEN

MDYKDHDGDYKDHIDYKDDDDKMAPKKKRKVGIHGVPMDLRTLGYSSQQQEKIKP  
KVRSTVAQHHEALVGHGFTHAHIVALSQHPAALGTVAVTYQHIITALPEATHEDIVGVG  
KQWSGARALEALLTDAGELRGPPLQLDTGQLVKIAKRGGV TAMEAVHASRNALTGAP



LNLTPDQVVAIASHDGGKQALETVQRLLPVLCQDHGLTPDQVVAIASNNGGKQALETV  
QRLLPVLCQDHGLTPDQVVAIASNIGGKQALETVQRLLPVLCQDHGLTPDQVVAIASHD  
GGKQALETVQRLLPVLCQDHGLTPDQVVAIASNNGGKQALETVQRLLPVLCQDHGLT  
PDQVVAIASNNGGKQALETVQRLLPVLCQDHGLTPDQVVAIASNNGGKQALETVQRLL  
PVLCQDHGLTPDQVVAIASNNGGKQALETVQRLLPVLCQDHGLTPDQVVAIASNNGG  
KQALETVQRLLPVLCQDHGLTPDQVVAIASHDGGKQALETVQRLLPVLCQDHGLTPDQ  
VVAIASHDGGKQALETVQRLLPVLCQDHGLTPDQVVAIASNNGGKQALETVQRLLPVL  
CQDHGLTPDQVVAIASNNGGKQALETVQRLLPVLCQDHGLTPDQVVAIASNNGGKQA  
LETVQRLLPVLCQDHGLTPDQVVAIASHDGGKQALETVQRLLPVLCQDHGLTPDQVVA  
IASHDGGKQALETVQRLLPVLCQDHGLTPDQVVAIASNNGGKQALESIVAQLSRPDP  
LAALTNDHLVALACLGGRPAMDAVKKGLPHAPELIRRVRNRRIGERTSHRVA<sup>GSQLVKS</sup>  
ELEEKKSELRHKLKYVPHEYIELIEIARNPTQDRILEMKVMEFFMKVYGYRGEHLGGS  
KPDGAIYTVGSPIDYGVIVDTKAYSGGYNLPIGQADEMERYVEENQTRDKHLNPN  
NEWWKVYPSSVTEFKFLFVSGHFKGNYKAQLTRLNHITNCNGAVLSVEELLIGGEMIKAGTL  
TLEEVRRKFNNGEINF<sup>RS</sup><sup>GGGEGRGSLLTCGDVEENPGPRMDYKDHDGDYKDHDIDY</sup>  
<sup>KDDDDK</sup>MAPKKRKRKVGIHGVPM<sup>VDLRTL</sup>GYSSQQQKEKIKPKVRS<sup>TVAQHHEALVGHG</sup>  
FTHAHIVALSQHPAALGTVAVTYQHIITALPEATHEDIVGVGKQWSGARALEALLTDAG  
ELRGPPLQLDTGQLVKIAKRGGVTAMEAVHASRNALTGAPLNLTDPQVVAIASNNGGK  
QALETVQRLLPVLCQDHGLTPDQVVAIASHDGGKQALETVQRLLPVLCQDHGLTPDQV  
VAIASHDGGKQALETVQRLLPVLCQDHGLTPDQVVAIASNNGGKQALETVQRLLPVLC  
QDHGLTPDQVVAIASNNGGKQALETVQRLLPVLCQDHGLTPDQVVAIASHDGGKQAL  
ETVQRLLPVLCQDHGLTPDQVVAIASNIGGKQALETVQRLLPVLCQDHGLTPDQVVAIA  
SNNGGKQALETVQRLLPVLCQDHGLTPDQVVAIASHDGGKQALETVQRLLPVLCQDH  
GLTPDQVVAIASNNGGKQALETVQRLLPVLCQDHGLTPDQVVAIASHDGGKQALETVQ  
RLLPVLCQDHGLTPDQVVAIASNNGGKQALETVQRLLPVLCQDHGLTPDQVVAIASHD  
GGKQALETVQRLLPVLCQDHGLTPDQVVAIASHDGGKQALETVQRLLPVLCQDHGLT  
PDQVVAIASNIGGKQALETVQRLLPVLCQDHGLTPDQVVAIASNNGGKQALETVQRLL  
PVLCQDHGLTPDQVVAIASHDGGKQALETVQRLLPVLCQDHGLTPDQVVAIASNNGG  
KQALETVQRLLPVLCQDHGLTPDQVVAIASNNGGKQALESIVAQLSRPDPALAALTND  
HLVALACLGGRPAMDAVKKGLPHAPELIRRVRNRRIGERTSHRVA<sup>GSQLVKSELEEKKS</sup>  
ELRHKLKYVPHEYIELIEIARNPTQDRILEMKVMEFFMKVYGYRGEHLGGSRKPDGAIY  
TVGSPIDYGVIVDTKAYSGGYNLPIGQADEMQRVYKQENQTRNKHINPNEWWKVYPSS  
VTEFKFLFVSGHFKGNYKAQLTRLNRKTNCNGAVLSVEELLIGGEMIKAGTLTLEEVRR  
KFNNGEINF

>Ano5E5A-TALEN

M<sup>MDYKDHDGDYKDHDIDYKDDDDK</sup>MAPKKRKRKVGIHGVPM<sup>VDLRTL</sup>GYSSQQQKEKIKP  
KVRSTVAQHHEALVGHGFTHAHIVALSQHPAALGTVAVTYQHIITALPEATHEDIVGVG  
KQWSGARALEALLTDAGELRGPPLQLDTGQLVKIAKRGGVTAMEAVHASRNALTGAP  
LNLTDPQVVAIASHDGGKQALETVQRLLPVLCQDHGLTPDQVVAIASHDGGKQALETV  
QRLLPVLCQDHGLTPDQVVAIASNIGGKQALETVQRLLPVLCQDHGLTPDQVVAIASN  
GGKQALETVQRLLPVLCQDHGLTPDQVVAIASNIGGKQALETVQRLLPVLCQDHGLTP  
DQVVAIASNNGGKQALETVQRLLPVLCQDHGLTPDQVVAIASNIGGKQALETVQRLLP

VLCQDHGLTPDQVVAIASNIGGKQALETVQRLLPVLCQDHGLTPDQVVAIASNNGGKQ  
ALETVQRLLPVLCQDHGLTPDQVVAIASNNGGKQALETVQRLLPVLCQDHGLTPDQV  
AIASNNGGKQALETVQRLLPVLCQDHGLTPDQVVAIASNIGGKQALETVQRLLPVLCQD  
HGLTPDQVVAIASNNGGKQALETVQRLLPVLCQDHGLTPDQVVAIASHDGGKQALETV  
QRPVQRLLPVLCQDHGLTPDQVVAIASNIGGKQALESIVAQLSRPDPALAALTNDHLVA  
LACLGGRPAMDVAKKGLPHAPELIRRVNRRIGERTSHRVA GSQLVKSELEEKSELRH  
KLKYVPHEYIELIEIARNPTQDRILEMKVMEFFMKVYGYRGEHLGGSRKPDGAIYTVGS  
PIDYGVIVDTKAYSGGYNLPIGQADEMERYVEENQTRDKHLNPNNEWKVVYSSVTEF  
KFLFVSGHFKGNYKAQLTRLNHITNCNGAVLSVEELLIGGEMIKAGTLTLEEVRRKFNN  
GEINFRS GGGEGRGSLLTCGDVEENPGPRMDYKDHDGDYKDHDIDYKDDDDKMAPK  
KKRKVGIHGVPMDLRTLGYSSQQQEKIKPKVRSSTVAQHHEALVGHGFTHAHIVALSQ  
HPAALGTAVTYQHITALPEATHEDIVGVGKQWSGARALEALLTDAGELRGPPLQLDT  
GQLVKIAKRGV TAMEAVHASRNAL TGAPLNLTPDQVVAIASNNGGKQALETVQRLLP  
VLCQDHGLTPDQVVAIASHDGGKQALETVQRLLPVLCQDHGLTPDQVVAIASHDGGK  
QALETVQRLLPVLCQDHGLTPDQVVAIASNIGGKQALETVQRLLPVLCQDHGLTPDQV  
VAIASNNGGKQALETVQRLLPVLCQDHGLTPDQVVAIASHDGGKQALETVQRLLPVLC  
QDHGLTPDQVVAIASNNGGKQALETVQRLLPVLCQDHGLTPDQVVAIASHDGGKQAL  
ETVQRLLPVLCQDHGLTPDQVVAIASNNGGKQALETVQRLLPVLCQDHGLTPDQVVAI  
ASNNGGKQALETVQRLLPVLCQDHGLTPDQVVAIASNIGGKQALETVQRLLPVLCQDH  
GLTPDQVVAIASNIGGKQALETVQRLLPVLCQDHGLTPDQVVAIASNNGGKQALETVQ  
RLLPVLCQDHGLTPDQVVAIASNIGGKQALETVQRVQRLLPVLCQDHGLTPDQVVAIA  
SNIGGKQALESIVAQLSRPDPALAALTNDHLVALACLGGRPAMDVAKKGLPHAPELIRR  
VNRRIGERTSHRVA GSQLVKSELEEKSELRHKLKYVPHEYIELIEIARNPTQDRILEMK  
VMEFFMKVYGYRGEHLGGSRKPDGAIYTVGSPIDYGVIVDTKAYSGGYNLPIGQADEM  
QRYVKENQTRNKHINPNNEWKVVYSSVTEFKFLFVSGHFKGNYKAQLTRLNRKTNCN  
GAVLSVEELLIGGEMIKAGTLTLEEVRRKFNNGEINF
